# Supplementary material
Source: Springer Nature journal article supplement (https://www.springermedizin.de/resource/supplementary/13014_2012_596_MOESM1_ESM.pdf/9634176)

### CTV1

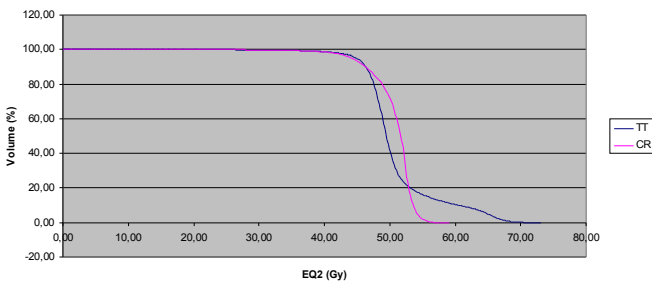

### CTVn

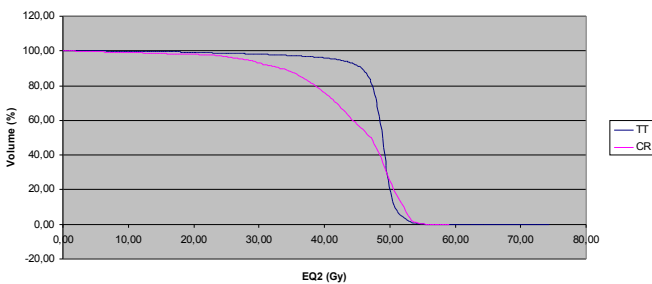

### Contralateral breast

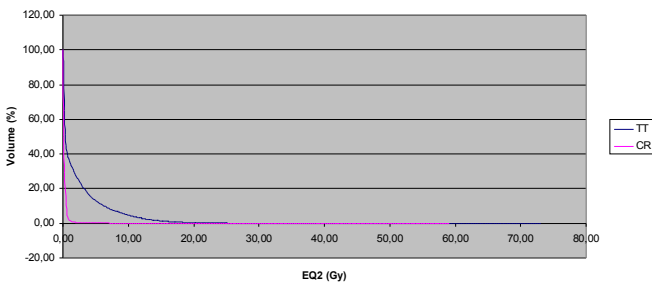

### Ipsilateral lung

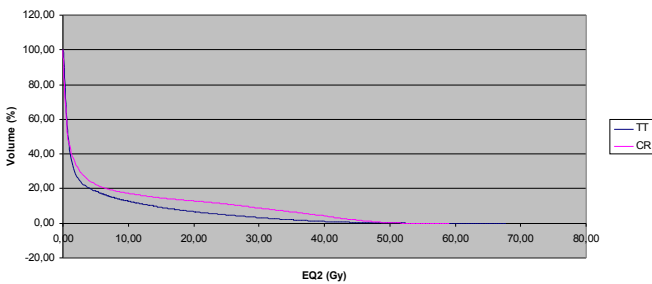

### Heart

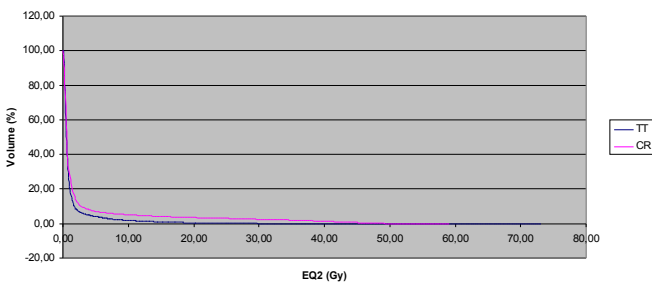

Supplement: MOESM1 [file 9634176]
